# Supplementary material for: Linear and nonlinear rheology and structural relaxation in dense glassy and jammed soft repulsive pNIPAM microgel suspensions
Source: Royal Society of Chemistry journal article supplement (doi:10.1039/c8sm02014k), 2018-12-26
Supplement: c8sm02014k1.pdf [file c8sm02014k1.pdf]

### Supplementary Material

2 The lightly cross-linked monodisperse PNIPAM microgels were prepared by the surfactant-  
free emulsion polymerization (SFEP) method [14]. 100 ml of Type I water (18.2 MΩ cm) was  
4 filtered through a 0.2 μm Acrodisc syringe filter. Then, 146 mM (1.65 g) of N-  
isopropylacrylamide (NIPAM, 99 %, Acros) monomer was dissolved in filtered water. The  
6 monomer solution was again filtered through a 0.2 μm Acrodisc syringe filter into a 3-neck  
round bottom flask. The solution was stirred at 500 rpm, purged with nitrogen, and heated to  
8 68°C in a temperature-controlled oil bath until the temperature of the solution became stable  
(1 hour typically). We then injected a solution of 2.8 mM (80 mg) potassium peroxydisulfate  
10 (KPS, 99 %+, Sigma-Aldrich) dissolved in 1 ml of the pre-filtered Type 1 water through a  
0.2 μm Acrodisc syringe filter to initiate the polymerization. The mixture was left to react  
12 under continuous stirring at 500 rpm in nitrogen atmosphere overnight. After the  
polymerization, the solution was cooled down to the room temperature and filtered with a glass  
14 wool five times to remove large particulates. The microgel particles were then thoroughly  
purified via five cycles of a centrifuge/dispersion process. The centrifugation was done at  
16 15000 xg of relative centrifugal force (RCF), and the dispersion was enabled by a mixed  
process of the ultrasonication followed by the magnetic stirring. The cleaned particles were  
18 then lyophilized for further characterization.

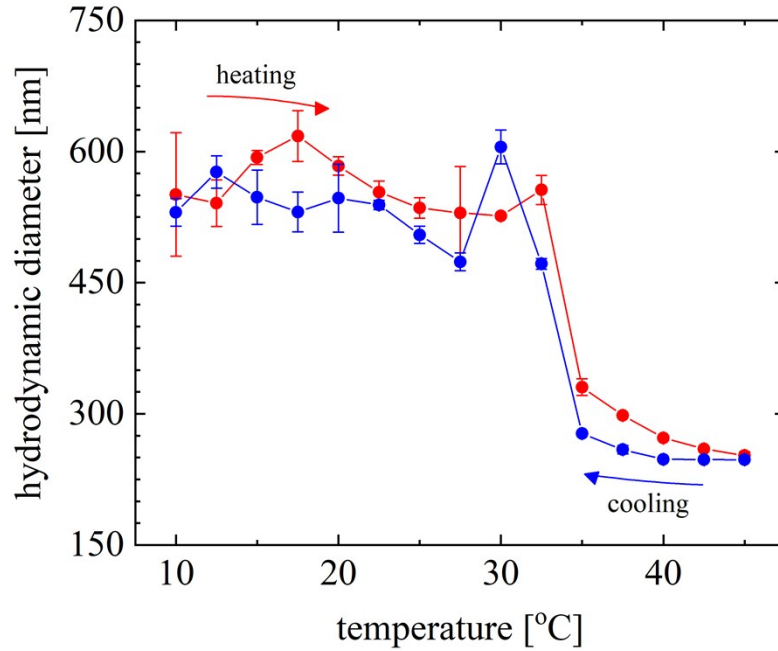

20 **Figure S1** -Temperature dependence of the hydrodynamic diameter in the low concentration limit  
(0.04 wt%) of slightly charged microgels measured via DLS. As temperature increases in the  
22 region  $T = 10 - 32^{\circ}\text{C}$ , there is a weak roughly linear decrease of the average hydrodynamic  
diameter. As the lower critical solution temperature (LCST) of pNIPAM microgels is crossed,  
24 microgels become hydrophobic and undergo massive deswelling.

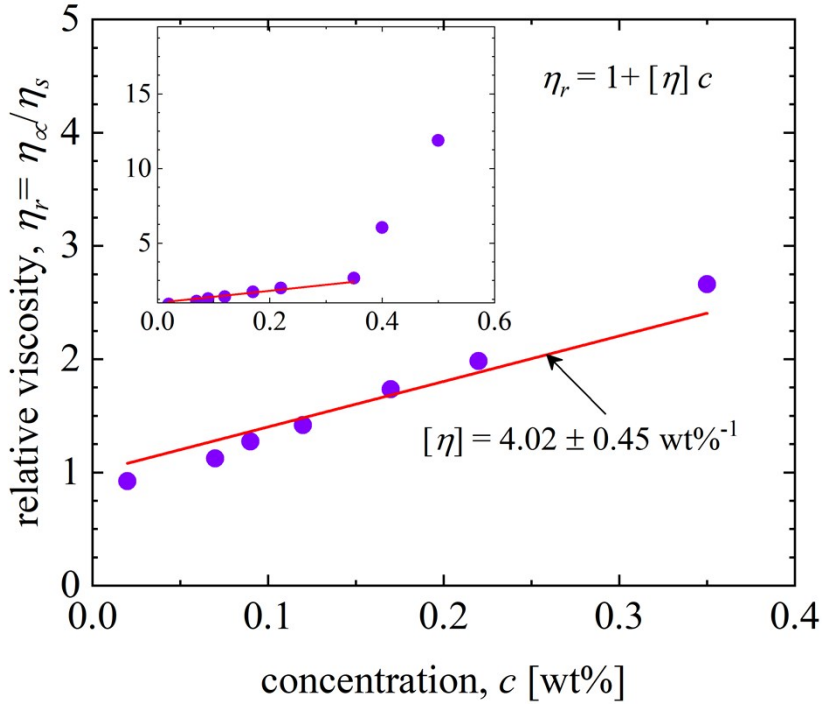

26

**Figure S2** - At low concentrations, the relative viscosity  $\eta_r = \eta_\infty/\eta_s$  at infinite shear rate (obtained

28 using a Carreau-Yasuda model fits,  $\eta(\dot{\gamma}) = \eta_\infty + (\eta_0 - \eta_\infty) \left[ 1 + (k\dot{\gamma})^a \right]^{\frac{n-1}{a}}$ ) agrees well with the

$$\frac{\eta}{\eta_s} = 1 + 2.5\phi$$

Einstein equation ( ). For dilute suspensions ( $c \rightarrow 0$ ), the effective volume fraction

30 can be related to the mass fraction using,  $2.5\phi = [\eta]c$ , where  $[\eta]$  is the intrinsic viscosity (

$[\eta] = 4.02 \pm 0.45 \text{ wt}\%^{-1}$ ). The solvent viscosity,  $\eta_s$ , is taken as that of deionized water (=

32  $0.001 \text{ Pa}\cdot\text{s}$ ). At higher concentrations ( $c > 0.35 \text{ wt}\%$ ) the viscosity strongly deviates in an upward

direction due to inter-particle repulsions, consistent with our observation of a measurable linear

34 elastic moduli at  $c = 0.4 \text{ wt}\%$ .

36

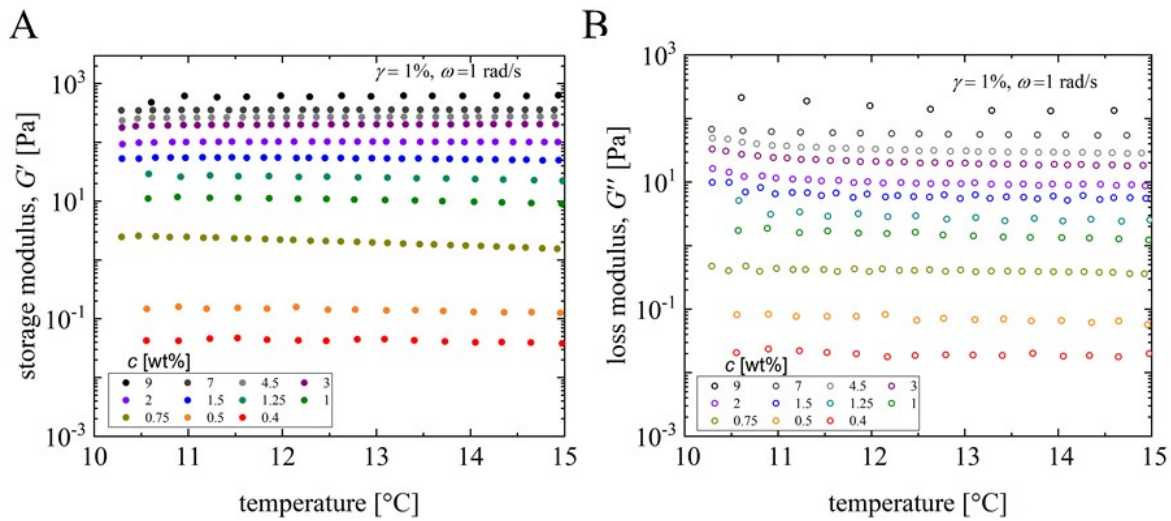

40

**Figure S3** - (A) Storage modulus,  $G'$  and (B) Loss modulus,  $G''$ , for various microgel  
 42 concentrations in the temperature range  $(10 - 15)^{\circ}\text{C}$  probed at a fixed strain amplitude of  
 $\gamma_0 = 1\%$  in the linear response regime at an angular frequency of  $\omega = 1 \text{ rad/s}$ . The temperature  
 44 is increased at a rate of  $1^{\circ}\text{C}/\text{min}$ . The rheological properties are temperature independent in the  
 range of probed temperature.

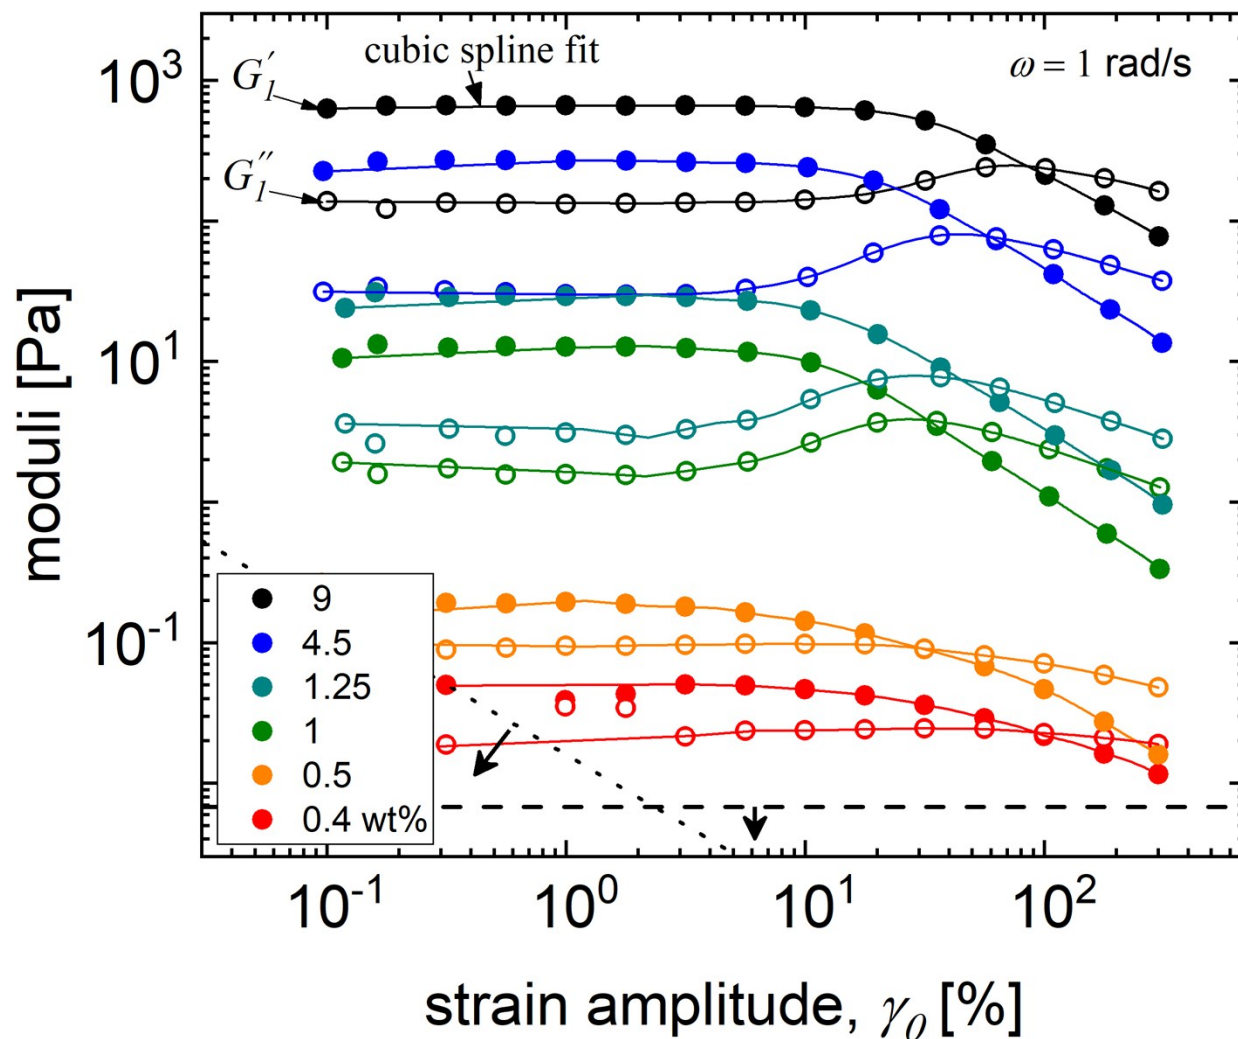

46

**Figure S4** - Cubic spline fits to the amplitude sweep data to extract the yield properties. The strain  
 48 amplitude at which a cubic spline fit to  $G'_1$  achieves a maximum is taken as the dynamic yield  
 strain and the point of intersection of cubic spline fits to  $G'_1$  and  $G''_1$  is taken as the absolute yield  
 50 strain.

Table S1: Parameters used in theory

| Parameter                      | Value           | How determined                                                                                                                                                                                                                                                                                                                                           |
|--------------------------------|-----------------|----------------------------------------------------------------------------------------------------------------------------------------------------------------------------------------------------------------------------------------------------------------------------------------------------------------------------------------------------------|
| $2R$                           | 550 nm          | Measured by DLS at low concentration (0.4 wt%)                                                                                                                                                                                                                                                                                                           |
| $c_1$                          | 0.4wt%          | Lowest concentration studied in experiments                                                                                                                                                                                                                                                                                                              |
| $c_2$                          | 1.5wt%          | Observed concentration where $G'(c)$ plot turns to linear dependence                                                                                                                                                                                                                                                                                     |
| $(\phi_{0.5 \text{ wt}\%}, E)$ | (0.5067, 30000) | Volume fraction $\phi_{0.5\text{wt}\%}$ and softness parameter E are determined simultaneously from the inset of Fig. 8 by requiring the theoretical prediction of modulus to match the modulus at 0.5wt% and additionally requiring that theory produces a similar order of magnitude growth in $G'$ as that of experiments before soft jamming occurs. |

54 The volume fraction at all concentrations is obtained by using the relations:

56  $\phi \sim c^{1/2}$  for  $0.5 < c < 1.5\text{wt}\%$ , and  $\phi \sim c^0$  for  $1.5 < c < 9 \text{ wt}\%$

58 and  $\phi_{0.5\text{wt}\%} = 0.5067$ .
